# Supplementary material for: IRF1 is critical for the TNF-driven interferon response in rheumatoid fibroblast-like synoviocytes: JAKinibs suppress the interferon response in RA-FLSs
Source: PubMed Central journal article supplement (PMC6802656; doi:10.1038/s12276-019-0267-6), 2019-07-08
Supplement: 12276_2019_267_MOESM5_ESM.pdf [file 12276_2019_267_MOESM5_ESM.pdf]

## Supplementary Figure 4.

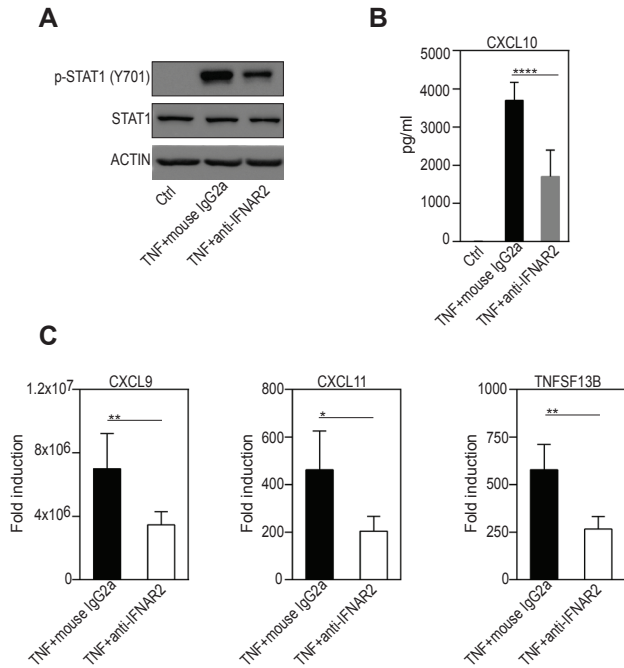

### Supplementary Figure 4.

**A. and B and C.** FLS were stimulated with TNF for three (A.), twentyfour (B.) or six hours (C.) in the presence of an anti-human IFNAR2 (mouse IgG2a, clone MMHAR-2, 4 µg/ml) blocking or a non-specific mouse IgG2a antibody (4 µg/ml).

**A.** Western blots of total and phosphorylated STAT1 expression in RA-FLS. Representative western blots of at least four experiments are shown.

**B.** Supernatants were analyzed for CXCL10 expression by ELISA. Values are the mean±SEM. n=8. Paired t-test. p<0.0001.

**C.** qPCR analysis of CXCL9 (Wilcoxon matched pairs test, p<0.005), CXCL11 (Paired t-test, p<0.02) and TNFSF13B (Paired t-test, p<0.005) expression in RA-FLS. Expression is presented relative to unstimulated cells. Values are the mean±SEM. n=8.
